# Supplementary material
Source: publisher figshare collection journal article supplement (https://adisjournals.figshare.com/articles/dataset/_/9785642)
Supplement: Supplementary file 1 [file 2]

# Forced vital capacity (FVC) decline in idiopathic pulmonary fibrosis (IPF) – modelling the myth

Marlies Wijisenbeek<sup>1</sup>, Eva Santermans<sup>2</sup>, Paul Ford<sup>2</sup>, Michael Kreuter<sup>3</sup>, Nadia Verbruggen<sup>2</sup>, Paul Meyvisch<sup>2</sup>, Wim Wuyts<sup>4</sup>, Kevin K. Brown<sup>5</sup>, David J. Lederer<sup>6</sup>, Toby M. Maher<sup>7,8</sup>

<sup>1</sup>Department of Respiratory Medicine, Erasmus MC, University Medical Centre Rotterdam, Rotterdam, the Netherlands; <sup>2</sup>Galapagos NV, Mechelen, Belgium; <sup>3</sup>Center for Interstitial and Rare Lung Diseases, Thoraxklinik, University Hospital Heidelberg, German Center for Lung Research, Heidelberg, Germany; <sup>4</sup>Unit for Interstitial Lung Diseases, Department of Pulmonary Medicine, University Hospitals Leuven, Leuven, Belgium; <sup>5</sup>Department of Medicine, National Jewish Health, Denver, CO, USA; <sup>6</sup>Columbia University Irving Medical Center, New York, NY, USA; <sup>7</sup>NIHR Respiratory Clinical Research Facility, Royal Brompton Hospital, London, UK; <sup>8</sup>Fibrosis Research Group, National Heart and Lung Institute, London, UK

Poster PA1733

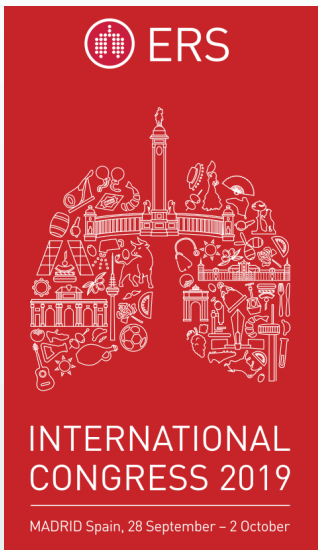

### Background and objective

FVC is the only registrational endpoint in IPF clinical trials. As most new treatments will be administered **on top of standard of care (SOC; pirfenidone or nintedanib)**, estimating treatment response will become more challenging. The objective of this study was to use data simulations to **quantify the variability associated with FVC decline over time** to model effects of an investigational drug for IPF, when given on top of SOC in a clinical trial setting.

### Methods

Publicly available **summary data** from FDA review of **nintedanib**\*  
**Source data** → Daily **home spirometry** data†

\*Pirfenidone data were excluded because the primary endpoint in key studies was ppFVC rather than FVC; †Obtained from a study of 50 patients with IPF who provided daily FVC readings over a median of 279 days

### FVC data simulation

based on assumptions for the mean, variance and correlation structure (CAR[1])\*

\*Mean at baseline: 2,700 mL; SD at baseline: 800 mL; constant SD over time; SD on change from baseline at Week 52: 275 mL

**50%** assumed to be taking SOC at study start and **50%** not

**400 IPF patients**

### Base simulation setting

(illustrative example of a clinical trial)

**1:1** Investigational drug vs Placebo  
Measurements at: Weeks 0, 2, 4, 8, 12, 18, 26, 34, 42 and 52

**Week 52**

Assumed treatment difference in FVC change from baseline: 90 mL

### Data analysis

ANCOVA LMM MMRM

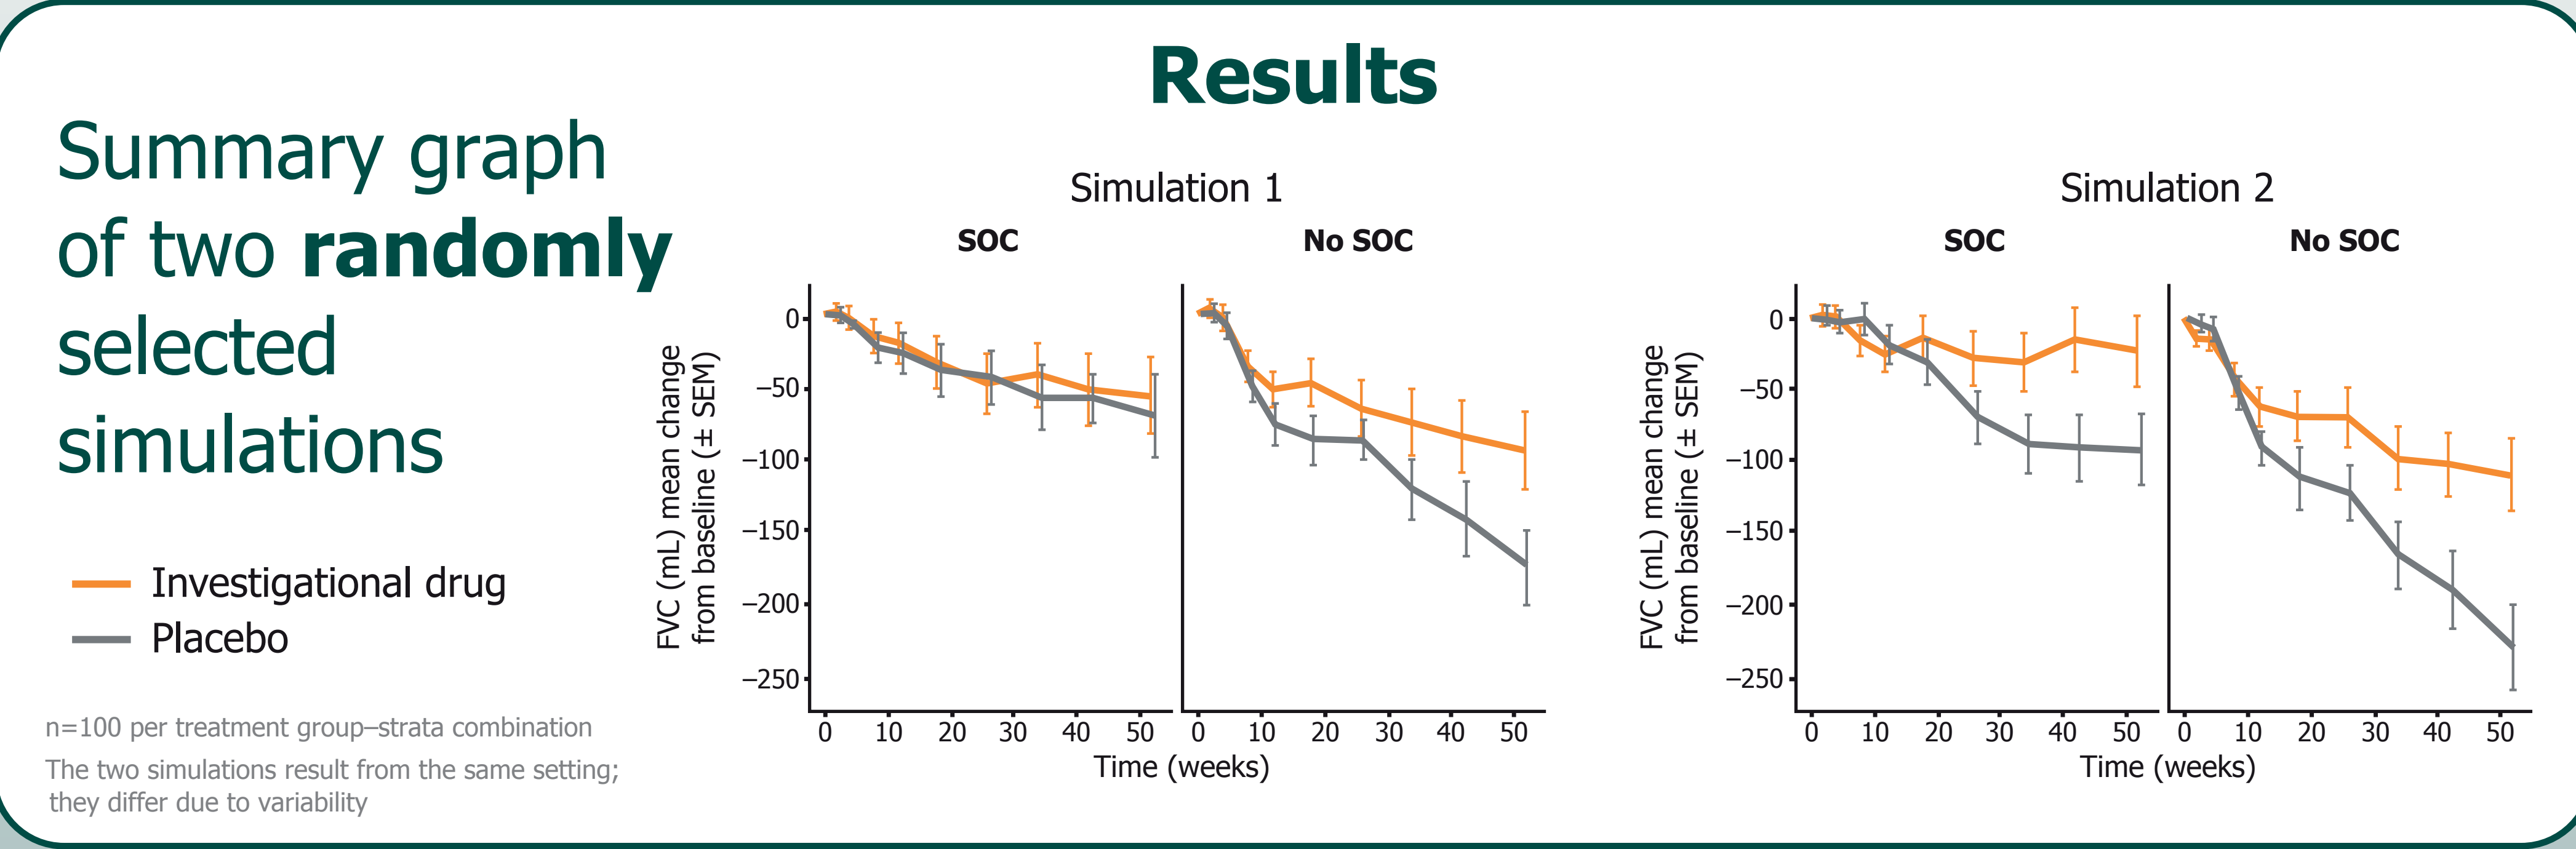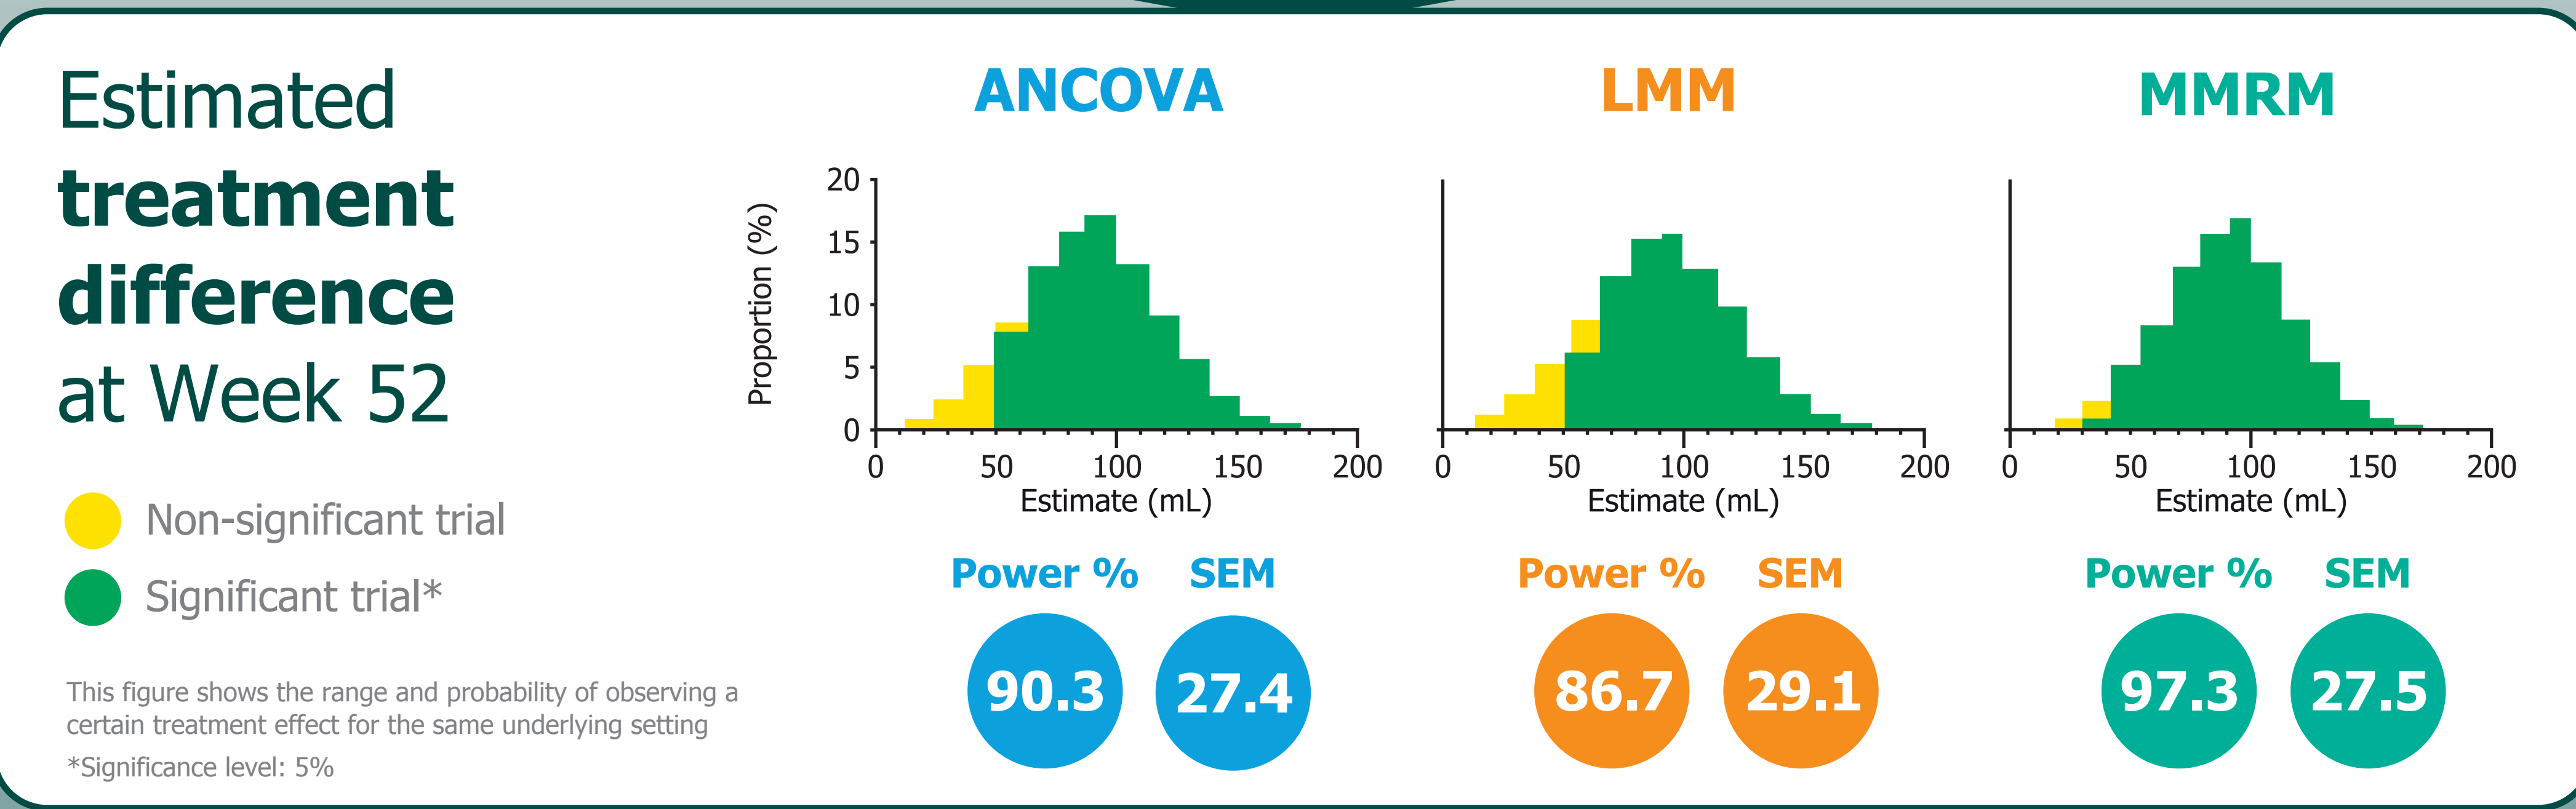

| Simulated trial scenarios                               | Decrease in trial power (%) |      |      |       | Increase/decrease in estimated treatment effect (mL) |      |      |
|---------------------------------------------------------|-----------------------------|------|------|-------|------------------------------------------------------|------|------|
|                                                         | ANCOVA                      | LMM  | MMRM |       | ANCOVA                                               | LMM  | MMRM |
| 15% annual random dropout                               | 5.2                         | 3.4  | 0.6  | ••••• | 0.2                                                  | 0.3  | 0.2  |
| 15% annual dropout due to observed FVC decline*         | 9.3                         | 1.5  | 0.8  | ••••• | 11.9                                                 | 4.4  | 3.3  |
| 15% annual dropout due to unobserved FVC decline†       | 12.2                        | 4.9  | 2.7  | ••••• | 15.0                                                 | 8.5  | 12.0 |
| 50% of placebo group initiate SOC during trial          | 7.9                         | 8.9  | 3.7  | ••••• | 11.2                                                 | 11.3 | 11.2 |
| 25% of subjects on SOC lower investigational drug dose  | 1.0                         | 1.2  | 0.3  | ••••• | 2.6                                                  | 2.7  | 2.7  |
| 25% of subjects on SOC discontinue investigational drug | 3.5                         | 4.5  | 1.4  | ••••• | 5.6                                                  | 5.9  | 5.6  |
| Combined effect of 5% dropout‡ and 15% initiating SOC   | 6.2                         | 4.4  | 1.7  | ••••• | 7.1                                                  | 5.8  | 6.7  |
| Shortening of trial length to 26 weeks                  | 28.3                        | 27.5 | 15.6 | ••••• | 0.5                                                  | 0.8  | 0.5  |

ANCOVA, analysis of covariance model; CAR(1), continuous-time autoregressive model of order 1; FDA, US Food and Drug Administration; IPF, idiopathic pulmonary fibrosis; LMM, linear mixed model; MMRM, mixed model repeated measures; (pp)FVC, (percent predicted) forced vital capacity; SD, standard deviation; SEM, standard error of the mean; SOC, standard of care

### Conclusions

New IPF treatments will likely be given **on top of SOC (pirfenidone or nintedanib)**<sup>2,3</sup> and will need to show efficacy in this scenario, in terms of FVC, in clinical trials

**GLPG1690**, a first-in-class autotaxin inhibitor, is under evaluation on top of SOC in the phase 3 **ISABELA** studies<sup>4</sup>

**Demonstrating efficacy on top of SOC is challenging**

Due to FVC variability and the complex nature of such trials<sup>5</sup>

**Several clinical trial complexities may lead to reduced power to detect a significant treatment effect in trials of novel IPF treatments**

Treatment effect and underlying changes in FVC need to be distinguished

**Our model allowed us to quantify variability associated with FVC decline in a number of clinical trial scenarios**

It can be adapted/extended to other trial settings

**This permits robust power calculations to optimize clinical trial design**

Ultimately benefitting **patients** and helping healthcare professionals **better understand the pattern of FVC decline** that might be seen in clinical practice

### Disclosures

MW reports no personal fees; the Erasmus MC received an advisory board fee from Galapagos, and speaker and advisory board fees from Boehringer Ingelheim and Hoffmann-La Roche. ES is an employee of Galapagos. PF, NV and PM are employees of, and have received warrants from, Galapagos. MK reports grants and personal fees from Boehringer Ingelheim, Galapagos, and Roche. WW reports no personal fees; the University Hospitals Leuven has received consultancy fees from Galapagos and grants from Boehringer Ingelheim and Roche. KKB reports grants from the National Institutes of Health, and advisory board participation for Biogen, Blade, Boehringer Ingelheim, Galapagos, Galacto, Genoa Pharmaceuticals, Huitai Biomedicine, Lifemax, MedImmune, monARC Bionetworks, Open Source Imaging Consortium (OSIC), Pliant, ProMetec, Theravance, Third Pole, Three Lakes Partners, and Veracyte. DJL is a full-time employee of Regeneron Pharmaceuticals, Inc. He also reports personal fees from Boehringer Ingelheim, Galapagos, Philips Respiration, Roche, Sanofi Genzyme and Veracyte; grants and personal fees from Boehringer Ingelheim, Fibrogen, and Global Blood Therapeutics; unpaid Steering Committee membership for Galacto; unpaid advisory board membership and consultancy for Pliant; unpaid consultancy for Bristol-Myers Squibb; and institutional fees for consultancy work from the Pulmonary Fibrosis Foundation. TMM via his institution, has received industry-academic funding from GlaxoSmithKline R&D and UCB, and has received consultancy or speakers fees from Apellis, AstraZeneca, Bayer, Blade Therapeutics, Boehringer Ingelheim, Bristol-Myers Squibb, Galapagos, GlaxoSmithKline R&D, Indalo, Novartis, Pliant, ProMetec, Respinat, Roche, Samumed, and UCB.

### References

1. Chatfield C. The analysis of time series: an introduction. 6th edn. CRC Press: Boca Raton, FL, 2016
2. Raghu G, Rochwerg B, Zhang Y, et al. Am J Respir Crit Care Med 2015; 192(2):e3–e19
3. Raghu G, Selman M. Am J Respir Crit Care Med 2015; 191(3):252–254
4. Maher TM, Kreuter M, Lederer DJ, et al. BMC Open Respir Res 2019; 6:e000422
5. Schmidt SL, Tayob N, Han MK, et al. Chest 2014; 145(3):579–585

### Acknowledgments

We wish to thank the patients who provided home spirometry data and acknowledge Adam J. Byrne, Philip L. Molyneux, and Arun Sivanathan (Imperial College London, London, UK) and Catharina C. Moor (University Medical Center Rotterdam, Rotterdam, Netherlands) for their contributions to the work. Editorial support was provided by Debbie Sherwood BSc at Aspire Scientific Limited (Bollington, UK) and funded by Galapagos NV (Mechelen, Belgium).
