# Supplementary material
Source: publisher figshare collection journal article supplement (https://adisjournals.figshare.com/articles/dataset/_/9785642)
Supplement: Supplementary file 2 [file 2]

## Modelling Forced Vital Capacity in Idiopathic Pulmonary Fibrosis: Optimising Trial Design

Santermans, E., et al. Pulm Ther. 2018.

This slide deck represents the opinions of the authors. This study was funded by Galapagos NV (Mechelen, Belgium). Medical writing assistance for this study was provided by Alice Wareham at Aspire Scientific. For a full list of acknowledgments and disclosures for all authors of this article, please see the full text online. © The Author(s) 2019.

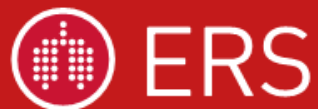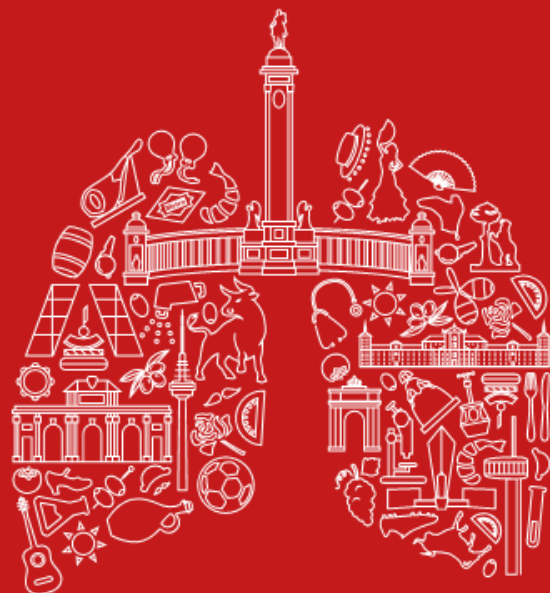

# INTERNATIONAL CONGRESS 2019

MADRID Spain, 28 September – 2 October

Poster PA1733

## Forced vital capacity (FVC) decline in idiopathic pulmonary fibrosis (IPF) – modelling the myth

**Marlies Wijsenbeek<sup>1</sup>**, Eva Santermans<sup>2</sup>, Paul Ford<sup>2</sup>,  
Michael Kreuter<sup>3</sup>, Nadia Verbruggen<sup>2</sup>, Paul Meyvisch<sup>2</sup>, Wim  
Wuyts<sup>4</sup>, Kevin K. Brown<sup>5</sup>, David J. Lederer<sup>6</sup>, Toby M. Maher<sup>7,8</sup>

<sup>1</sup>Department of Respiratory Medicine, Erasmus MC, University Medical Centre Rotterdam, Rotterdam, the Netherlands; <sup>2</sup>Galapagos NV, Mechelen, Belgium; <sup>3</sup>Center for Interstitial and Rare Lung Diseases, Thoraxklinik, University Hospital Heidelberg, German Center for Lung Research, Heidelberg, Germany; <sup>4</sup>Unit for Interstitial Lung Diseases, Department of Pulmonary Medicine, University Hospitals Leuven, Leuven, Belgium; <sup>5</sup>Department of Medicine, National Jewish Health, Denver, CO, USA; <sup>6</sup>Columbia University Irving Medical Center, New York, NY, USA; <sup>7</sup>NIHR Respiratory Clinical Research Facility, Royal Brompton Hospital, London, UK; <sup>8</sup>Fibrosis Research Group, National Heart and Lung Institute, London, UK

# Disclosures

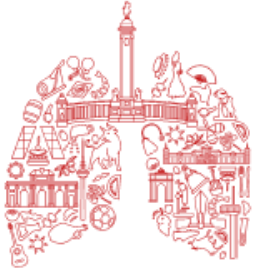

Marlies Wijsenbeek reports no personal fees; the Erasmus MC received an advisory board fee from Galapagos, speaker and advisory board fees from Boehringer Ingelheim and Hoffmann-La Roche, and grants from Boehringer Ingelheim, Hoffmann-La Roche, The Netherlands Organisation for Health Research and Development (ZonMW), the Dutch Lung Foundation, the Dutch Pulmonary Fibrosis Patients Association, and the Erasmus MC Thorax Foundation.

# Rationale and objective

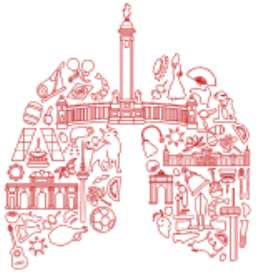

- FVC is the only registrational endpoint in IPF clinical trials
- As most new treatments will be administered **on top of standard of care (SOC; pirfenidone or nintedanib)**, estimating treatment response will become more challenging
- The objective of this study was to use data simulations to **quantify the variability associated with FVC decline over time** to model effects of an investigational drug for IPF when given on top of SOC in a clinical trial setting, and to **model the impact of a range of clinical trial scenarios**

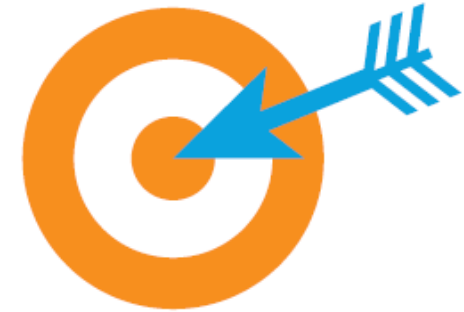

# Methods

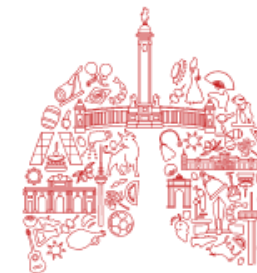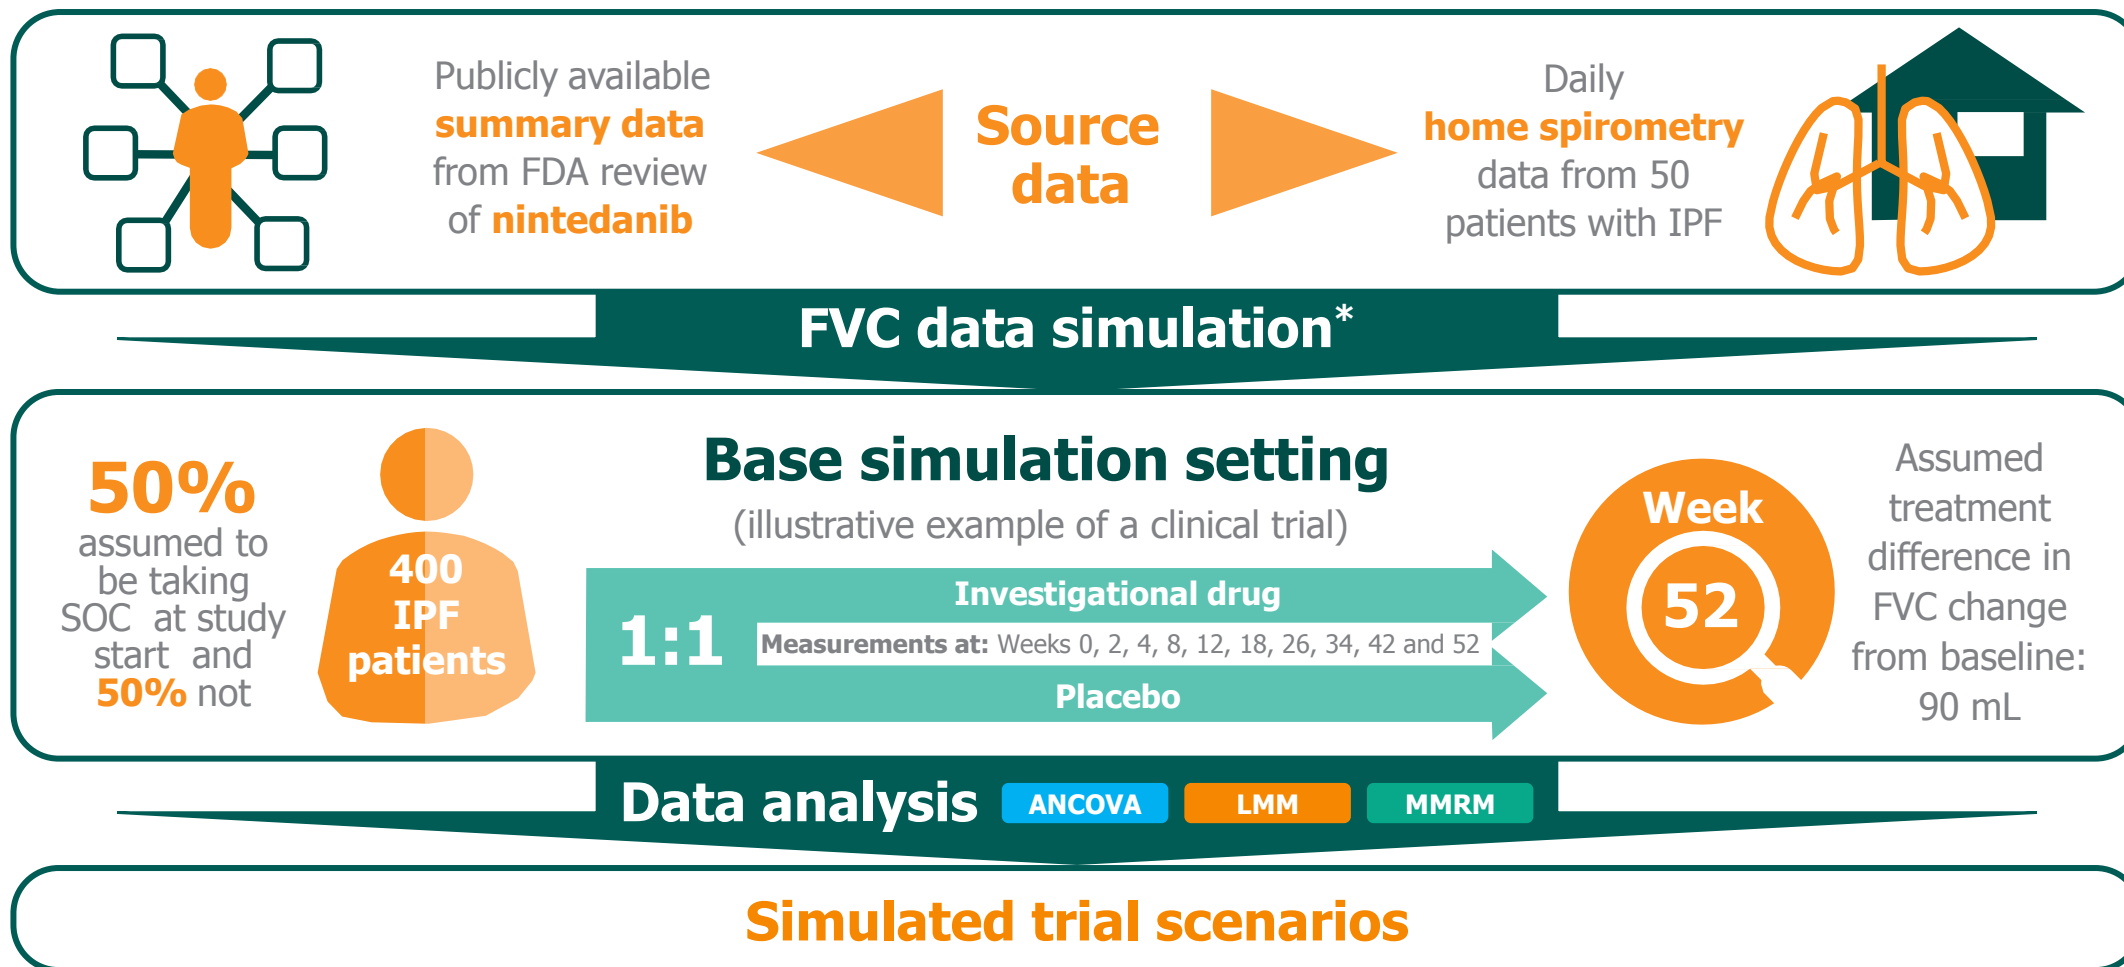

\*Based on assumptions for the correlation structure (CAR[1]), mean and variance; ANCOVA, analysis of covariance model; CAR(1), continuous-time autoregressive model of order 1; IPF, idiopathic pulmonary fibrosis; LMM, linear mixed model; MMRM, mixed model repeated measures; FVC, forced vital capacity; SOC, standard of care

# Results

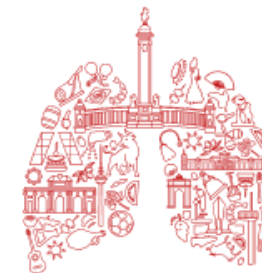

The analysis method used impacts the results obtained

**ANCOVA**  
Power % SEM  
**90.3** **27.4**

**LMM**  
Power % SEM  
**86.7** **29.1**

**MMRM**  
Power % SEM  
**97.3** **27.5**

## Simulated trial scenarios

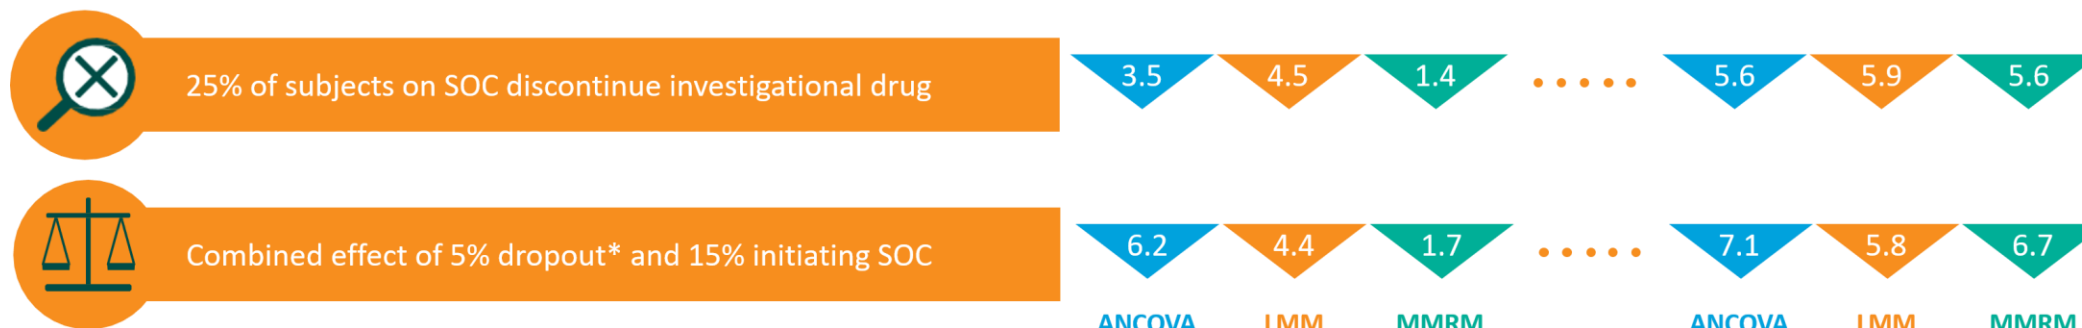

# Conclusions

A full paper has been published  
simultaneously in *Advances in Therapy*

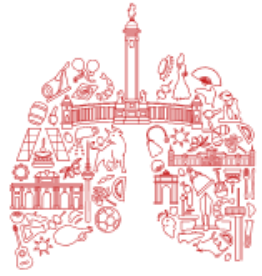

- Modeling allows us to **quantify variability** associated with **FVC decline** in a number of clinical trial scenarios

- This permits robust power calculations to **optimize clinical trial design**

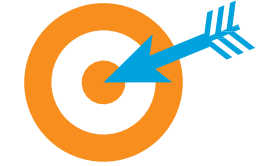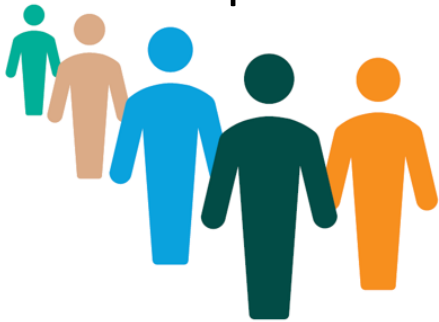

- This helps healthcare professionals **better understand the pattern of FVC decline** seen in clinical practice, ultimately **benefitting patients**

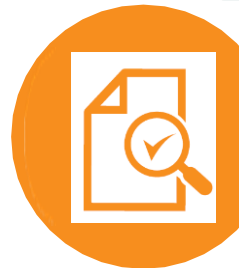

For further information please see Poster PA1733 and symposium “Management approaches in idiopathic pulmonary fibrosis: can we do better for patients?”  
17:15–19:15 in RETIRO

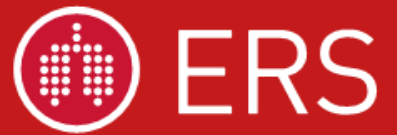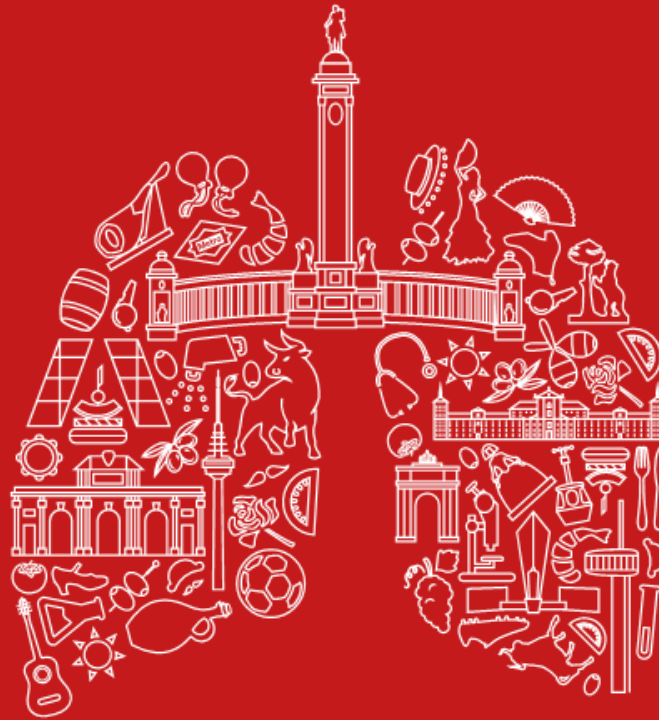

# INTERNATIONAL CONGRESS 2019

MADRID Spain, 28 September – 2 October



## Acknowledgments

**Funding.** The research and Rapid Service Fee was funded by Galapagos NV (Mechelen, Belgium). All authors had full access to all of the data in this study.

**Medical Writing, Editorial, and Other Assistance.** Medical writing support (including development of drafts in consultation with the authors, assembling tables and figures, collating author comments, copyediting, fact checking and referencing) was provided by Alice Wareham PhD, CMPP at Aspire Scientific (Bollington, UK). Support for this assistance was funded by Galapagos NV (Mechelen, Belgium).

**Authorship.** All named authors meet the International Committee of Medical Journal Editors (ICMJE) criteria for authorship for this article, take responsibility for the integrity of the work as a whole, and have given their approval for this version to be published.

**Authorship Contributions.** Eva Santermans contributed to the study design, data collection and data analysis. Adam J. Byrne, Philip L. Molyneaux, Arunon Sivananthan and Toby M. Maher contributed to data collection.

## Acknowledgments

**Disclosures.** Eva Santermans is an employee of Galapagos. Paul Ford, Nadia Verbruggen is an employee of, and have received warrants from, Galapagos. Paul Meyvisch is an employee of, and have received warrants from, Galapagos. Michael Kreuter reports grants and personal fees from Galapagos during the conduct of the study, and grants and personal fees from Boehringer Ingelheim and Roche outside the submitted work. Wim A. Wuyts reports no personal fees; the University Hospitals Leuven received consultancy fees from Galapagos during the conduct of the study and grants from Boehringer Ingelheim and Roche outside the submitted work. Kevin K. Brown reports grants from the National Institute of Health, and advisory board participation for Biogen, Blade, Boehringer Ingelheim, Galapagos, Galecto, Genoa, Huitai Biomedicine, Lifemax, MedImmune, monARC Bionetworks, Open Source Imaging Consortium (OSIC), Pliant, ProMetic, Theravance, Third Pole, Three Lakes Partners, and Veracyte outside the submitted work. David J. Lederer is a fulltime employee of Regeneron Pharmaceuticals, Inc. He also reports personal fees from Galapagos during the conduct of the study, prior personal fees from Boehringer Ingelheim relating to studies used as source data in the current study, and personal fees from Philips Respironics, Roche, Sanofi Genzyme and Veracyte, grants and personal fees from Boehringer Ingelheim, Fibrogen, and Global Blood Therapeutics, unpaid Steering Committee membership for Galecto, unpaid advisory board membership and consultancy for Pliant, unpaid consultancy for Bristol-Myers Squibb, and institutional fees for consultancy work from the Pulmonary Fibrosis Foundation outside the submitted work. Adam J. Byrne, Catharina C. Moor and Arunon Sivananthan have nothing to disclose. Philip L. Molyneaux and his institution have received speaker and advisory board fees from Boehringer Ingelheim and Hoffman-La Roche outside the submitted work. Toby M. Maher via his institution, has received industry-academic funding from GlaxoSmithKline R&D and UCB, and has received consultancy or speakers fees from Apellis, Astra Zeneca, Bayer, Blade Therapeutics, Boehringer Ingelheim, Bristol-Myers Squibb, Galapagos, GlaxoSmithKline R&D, Indalo, Novartis, Pliant, ProMetic, Respivnat, Roche, Samumed, and UCB outside the submitted work. Marlies Wijzenbeek reports no personal fees; the Erasmus MC received an advisory board fee from Galapagos, and speaker and advisory board fees from Boehringer Ingelheim and Hoffman-La Roche outside the submitted work.

**Compliance with Ethics Guidelines.** This article is based on previously conducted studies and does not contain any studies with human participants or animals performed by any of the authors.

## Copyright

Copyright © The Authors (CC BY).

This slide deck is distributed under the terms of the Creative Commons Attribution License which permits any use, distribution, and reproduction in any medium, provided the original author(s) and the source are credited.
